# Supplementary material for: Historical evolution of the geomagnetic declination at the Royal Observatory of Madrid
Source: Copernicus journal article supplement (doi:10.5194/hgss-15-81-2024), 2024-11-13
Supplement: Supplementary file 1 [file hgss-15-81-2024-supplement.pdf]

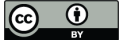

*Supplement of*

## **Historical evolution of the geomagnetic declination at the Royal Observatory of Madrid**

**Jose Manuel Tordesillas et al.**

*Correspondence to:* Jose Manuel Tordesillas ([jmtordesillas@transportes.gob.es](mailto:jmtordesillas@transportes.gob.es))

The copyright of individual parts of the supplement might differ from the article licence.

## SUPPLEMENTARY MATERIAL

### **S1 Geomagnetic Reference Model for the Iberian Peninsula and Balearic Islands for 2020.0**

This geomagnetic model has been generated by Instituto Geográfico Nacional of Spain (IGN) in collaboration with the Universidad Complutense de Madrid (UCM).

Information about the generation of the model, the visualization of the results obtained for each component and the link for download the model, are available in the following url:

<https://www.ign.es/web/ign/portal/modelo-geomagnetico-referencia-2020>

### **S2 Monitoring of the agonic line crossing the Royal Observatory of Madrid (ROM):**

The monitoring of the crossing of the agonic line through Madrid (Spain) in near real time was carried out by Instituto Geográfico Nacional between September 2021 and September 2023 on its website.

At present, the following link shows a graphic of the evolution of the declination daily mean value for the years 2021 and 2022. Information of the evolution of the agonic line in Spain is also provided.

<https://www.ign.es/web/ign/portal/paso-de-la-linea-agona-por-madrid>

### **S3 Geomagnetic measurements carried out at ROM in 1855**

In 1855 Mr. Rico Sinobas carried out a set of daily declination measurements along the month of September. He also made seven magnetic inclination measurements. These data were published by him in 1856. Table S1 shows the declination values published by Mr. Rico Sinobas and Table S2 shows the inclination values.

Table S1. Declination values measured by Mr. Rico Sinobas at ROM in 1855.

| <b>Date</b> | <b>Time (Gottinga)</b> | <b>Declination</b> |
|-------------|------------------------|--------------------|
| 31/8/1855   | 20h 0m                 | 22° 22' 27" W      |
| 1/9/1855    | 2h 30m                 | 22° 29' 39" W      |
| 1/9/1855    | 20h 0m                 | 22° 21' 1" W       |
| 2/9/1855    | 2h 30m                 | 22° 31' 0" W       |
| 2/9/1855    | 20h 0m                 | 22° 22' 10" W      |
| 3/9/1855    | 2h 30m                 | 22° 30' 44" W      |
| 3/9/1855    | 20h 0m                 | 22° 21' 49" W      |
| 4/9/1855    | 2h 30m                 | 22° 29' 55" W      |
| 4/9/1855    | 20h 0m                 | 22° 22' 38" W      |
| 5/9/1855    | 2h 30m                 | 22° 29' 23" W      |
| 5/9/1855    | 20h 0m                 | 22° 21' 49" W      |
| 6/9/1855    | 2h 30m                 | 22° 29' 6" W       |
| 6/9/1855    | 20h 0m                 | 22° 22' 27" W      |
| 7/9/1855    | 2h 30m                 | 22° 31' 0" W       |
| 7/9/1855    | 20h 0m                 | 22° 21' 28" W      |
| 8/9/1855    | 2h 30m                 | 22° 31' 13" W      |
| 8/9/1855    | 20h 0m                 | 22° 22' 27" W      |
| 9/9/1855    | 2h 30m                 | 22° 29' 39" W      |

|           |        |               |
|-----------|--------|---------------|
| 9/9/1855  | 20h 0m | 22° 20' 23" W |
| 10/9/1855 | 2h 30m | 22° 29' 39" W |
| 10/9/1855 | 20h 0m | 22° 20' 39" W |
| 11/9/1855 | 2h 30m | 22° 33' 53" W |
| 11/9/1855 | 20h 0m | 22° 21' 44" W |
| 12/9/1855 | 2h 30m | 22° 29' 11" W |
| 12/9/1855 | 20h 0m | 22° 21' 1" W  |
| 13/9/1855 | 2h 30m | 22° 30' 22" W |
| 13/9/1855 | 20h 0m | 22° 21' 49" W |
| 14/9/1855 | 2h 30m | 22° 29' 39" W |
| 14/9/1855 | 20h 0m | 22° 21' 6" W  |
| 15/9/1855 | 2h 30m | 22° 30' 22" W |
| 15/9/1855 | 20h 0m | 22° 22' 16" W |
| 16/9/1855 | 2h 30m | 22° 31' 32" W |
| 16/9/1855 | 20h 0m | 22° 22' 43" W |
| 17/9/1855 | 2h 30m | 22° 29' 28" W |
| 17/9/1855 | 20h 0m | 22° 21' 44" W |
| 18/9/1855 | 2h 30m | 22° 29' 39" W |
| 18/9/1855 | 20h 0m | 22° 21' 50" W |
| 19/9/1855 | 2h 30m | 22° 28' 50" W |
| 19/9/1855 | 20h 0m | 22° 23' 15" W |
| 20/9/1855 | 2h 30m | 22° 28' 39" W |
| 20/9/1855 | 20h 0m | 22° 22' 21" W |
| 21/9/1855 | 2h 30m | 22° 31' 16" W |
| 21/9/1855 | 20h 0m | 22° 22' 0" W  |
| 22/9/1855 | 2h 30m | 22° 29' 39" W |
| 22/9/1855 | 20h 0m | 22° 23' 10" W |
| 23/9/1855 | 2h 30m | 22° 28' 7" W  |
| 23/9/1855 | 20h 0m | 22° 22' 16" W |
| 24/9/1855 | 2h 30m | 22° 28' 42" W |
| 24/9/1855 | 20h 0m | 22° 22' 46" W |
| 25/9/1855 | 2h 30m | 22° 29' 6" W  |
| 25/9/1855 | 20h 0m | 22° 22' 8" W  |
| 26/9/1855 | 2h 30m | 22° 28' 50" W |
| 26/9/1855 | 20h 0m | 22° 28' 45" W |
| 27/9/1855 | 2h 30m | 22° 31' 27" W |
| 27/9/1855 | 20h 0m | 22° 28' 18" W |
| 28/9/1855 | 2h 30m | 22° 31' 0" W  |
| 28/9/1855 | 20h 0m | 22° 23' 48" W |
| 29/9/1855 | 2h 30m | 22° 28' 31" W |
| 29/9/1855 | 20h 0m | 22° 22' 29" W |
| 30/9/1855 | 2h 30m | 22° 28' 45" W |
| 30/9/1855 | 20h 0m | 22° 23' 29" W |
| 30/9/1855 | 22h 0m | 22° 22' 27" W |

Table S2. Inclination values measured by Mr. Rico Sinobas at ROM in 1855.

| <b>Date</b> | <b>Time (Local)</b> | <b>Inclination</b> |
|-------------|---------------------|--------------------|
| 1/9/1855    | 9h 0m               | 61° 18'            |
| 5/9/1855    | 15h 0m              | 61° 16'            |
| 8/9/1855    | 9h 0m               | 61° 20'            |
| 14/9/1855   | 9h 0m               | 61° 11'            |
| 17/9/1855   | 9h 0m               | 61° 18'            |
| 21/9/1855   | 15h 0m              | 61° 14'            |
| 29/9/1855   | 9h 0m               | 61° 22'            |

The original data published in Rico Sinobas (1856) are reproduced in Fig. S1 (declination) and Fig. S2 (inclination).

(a)

## Observaciones de declinación magnética en Madrid durante el mes de setiembre de 1853.

| ÉPOCAS.   | Tiempo de Göttinga.  | Lecturas en la escala del declinómetro. |       | Declinación magnética. |     |      | OBSERVACIONES.                                  |
|-----------|----------------------|-----------------------------------------|-------|------------------------|-----|------|-------------------------------------------------|
|           |                      |                                         |       |                        |     |      |                                                 |
| Agosto 31 | 20 <sup>h</sup> Got. | 201.0                                   | 201.0 | 22°                    | 22' | 27'' | Apenas sensible el movimiento del declinómetro. |
| Setiem. 1 | 2 <sup>h</sup> 30'   | 193.2                                   | 193.0 | 22                     | 29  | 39   | Movimiento perceptible.                         |
|           |                      | 192.7                                   |       |                        |     |      |                                                 |
|           |                      | 193.5                                   |       |                        |     |      |                                                 |
|           | 1 20 <sup>h</sup> 0' | 203.0                                   | 202.6 | 22                     | 21  | 1    | Movimiento lento.                               |
|           |                      | 202.2                                   |       |                        |     |      |                                                 |
|           |                      | 203.0                                   |       |                        |     |      |                                                 |
|           | 2 2 <sup>h</sup> 30' | 191.2                                   | 191.5 | 22                     | 31  | 0    |                                                 |
|           |                      | 192.0                                   |       |                        |     |      |                                                 |
|           |                      | 191.0                                   |       |                        |     |      |                                                 |
|           | 2 20 <sup>h</sup> 0  | 201.0                                   | 201.3 | 22                     | 22  | 10   | Apenas perceptible el movimiento.               |
|           |                      | 201.7                                   |       |                        |     |      |                                                 |
|           |                      | 201.0                                   |       |                        |     |      |                                                 |
|           | 3 2 <sup>h</sup> 30' | 191.5                                   | 191.8 | 22                     | 30  | 44   |                                                 |
|           |                      | 192.2                                   |       |                        |     |      |                                                 |
|           |                      | 191.5                                   |       |                        |     |      |                                                 |
|           | 3 20 <sup>h</sup> 0' | 201.5                                   | 201.7 | 22                     | 21  | 49   |                                                 |
|           |                      | 202.0                                   |       |                        |     |      |                                                 |
|           |                      | 201.5                                   |       |                        |     |      |                                                 |
|           | 4 2 <sup>h</sup> 30' | 192.5                                   | 192.7 | 22                     | 29  | 55   |                                                 |
|           |                      | 193.5                                   |       |                        |     |      |                                                 |
|           |                      | 192.5                                   |       |                        |     |      |                                                 |
|           | 4 20 <sup>h</sup> 0' | 200.5                                   | 200.8 | 22                     | 22  | 38   | Muy lento.                                      |
|           |                      | 201.2                                   |       |                        |     |      |                                                 |
|           |                      | 200.2                                   |       |                        |     |      |                                                 |
|           | 5 2 <sup>h</sup> 30' | 193.2                                   | 193.3 | 22                     | 29  | 23   |                                                 |
|           |                      | 193.5                                   |       |                        |     |      |                                                 |
|           |                      | 193.2                                   |       |                        |     |      |                                                 |
|           | 5 20 <sup>h</sup> 0' | 201.5                                   | 201.7 | 22                     | 21  | 49   |                                                 |
|           |                      | 202.0                                   |       |                        |     |      |                                                 |
|           |                      | 201.5                                   |       |                        |     |      |                                                 |
|           | 6 2 <sup>h</sup> 30' | 193.5                                   | 193.6 | 22                     | 29  | 6    |                                                 |
|           |                      | 193.8                                   |       |                        |     |      |                                                 |
|           |                      | 193.5                                   |       |                        |     |      |                                                 |
|           | 6 20 <sup>h</sup> 0' | 200.5                                   | 201.0 | 22                     | 22  | 27   |                                                 |
|           |                      | 201.5                                   |       |                        |     |      |                                                 |
|           |                      | 200.7                                   |       |                        |     |      |                                                 |
|           | 7 2 <sup>h</sup> 30' | 191.5                                   | 191.5 | 22                     | 31  | 0    |                                                 |
|           | 7 20 <sup>h</sup> 0' | 200.5                                   | 202.1 | 22                     | 21  | 28   | Movimiento muy perceptible.                     |
|           |                      | 203.8                                   |       |                        |     |      |                                                 |
|           |                      | 200.2                                   |       |                        |     |      |                                                 |
|           | 8 2 <sup>h</sup> 30' | 191.5                                   | 191.2 | 22                     | 31  | 13   |                                                 |
|           |                      | 191.0                                   |       |                        |     |      |                                                 |
|           |                      | 191.5                                   |       |                        |     |      |                                                 |

(b)

## Observaciones de declinacion magnética en Madrid durante el mes de setiembre de 1855.

| ÉPOCAS. | Tiempo de Gottinga.   | Lecturas en la escala del declinómetro. | Declinacion magnética. | OBSERVACIONES. |  |                                                                             |
|---------|-----------------------|-----------------------------------------|------------------------|----------------|--|-----------------------------------------------------------------------------|
| Setiem. | 8 20 <sup>h</sup> 0'  | 201.0                                   | 201.0                  | 22° 22' 27''   |  |                                                                             |
|         | 9 2 <sup>h</sup> 30'  | 193.0                                   | 193.0                  | 22 29 39       |  |                                                                             |
|         | 9 20 <sup>h</sup> 0'  | { 202.8<br>203.8<br>203.0 }             | 203.3                  | 22 20 23       |  | Mínima declinacion N. O. de setiembre.                                      |
|         | 10 2 <sup>h</sup> 30' | 193.0                                   | 193.0                  | 22 29 39       |  |                                                                             |
|         | 10 20 <sup>h</sup> 0' | { 202.8<br>203.8<br>202.8 }             | 203.0                  | 22 20 39       |  | Máxima declinacion N. O. de setiembre.                                      |
|         | 11 2 <sup>h</sup> 30' | { 188.5<br>188.2<br>188.5 }             | 188.3                  | 22 33 53       |  |                                                                             |
|         | 11 20 <sup>h</sup> 0' | { 202.0<br>201.5<br>202.2 }             | 201.8                  | 22 21 44       |  | Movimiento notable por su amplitud relativamente al observado en setiembre. |
|         | 12 2 <sup>h</sup> 30' | { 190.8<br>191.8<br>190.8 }             | 191.3                  | 22 29 11       |  |                                                                             |
|         | 12 20 <sup>h</sup> 0' | { 201.5<br>203.5<br>202.0 }             | 202.6                  | 22 21 1        |  |                                                                             |
|         | 13 2 <sup>h</sup> 30' | { 191.5<br>193.0<br>191.5 }             | 192.2                  | 22 30 22       |  |                                                                             |
|         | 13 20 <sup>h</sup> 0' | { 202.2<br>201.2<br>202.4 }             | 201.7                  | 22 21 49       |  |                                                                             |
|         | 14 2 <sup>h</sup> 30' | { 192.8<br>193.2<br>192.8 }             | 193.0                  | 22 29 39       |  |                                                                             |
|         | 14 20 <sup>h</sup> 9' | { 206.0<br>199.2<br>206.0 }             | 202.6                  | 22 21 6        |  |                                                                             |
|         | 15 2 <sup>h</sup> 30' | { 192.5<br>192.0<br>192.5 }             | 192.2                  | 22 30 22       |  |                                                                             |
|         | 15 20 <sup>h</sup> 0' | { 202.2<br>200.0<br>202.5 }             | 201.2                  | 22 22 16       |  |                                                                             |
|         | 16 2 <sup>h</sup> 30' | { 190.0<br>192.0<br>189.8 }             | 190.9                  | 22 31 32       |  |                                                                             |

(c)

## Observaciones de declinacion magnética en Madrid durante el mes de setiembre de 1855.

| ÉPOCAS.    | Tiempo de Gottinga. | Lecturas en la escala del declinómetro.                                       | Declinacion magnética. | OBSERVACIONES.                  |
|------------|---------------------|-------------------------------------------------------------------------------|------------------------|---------------------------------|
| Setiem. 16 | 20 <sup>h</sup> 0'  | $\left. \begin{array}{l} 204.5 \\ 196.5 \\ 205.2 \end{array} \right\} 200.7$  | 22° 22' 43''           | Movimiento oscilatorio notable. |
| 17         | 2 <sup>h</sup> 30'  | $\left. \begin{array}{l} 192.0 \\ 194.5 \\ 191.8 \end{array} \right\} 193.2$  | 22 29 28               |                                 |
| 17         | 20 <sup>h</sup> 0'  | $\left. \begin{array}{l} 200.2 \\ 203.5 \\ 200.0 \end{array} \right\} 201.8$  | 22 21 44               |                                 |
| 18         | 2 <sup>h</sup> 30'  | $\left. \begin{array}{l} 192.0 \\ 194.2 \\ 191.8 \end{array} \right\} 193.0$  | 22 29 39               |                                 |
| 18         | 20 <sup>h</sup> 0'  | $\left. \begin{array}{l} 201.5 \\ 203.2 \\ 201.7 \end{array} \right\} 202.8$  | 22 21 50               |                                 |
| 19         | 2 <sup>h</sup> 30'  | $\left. \begin{array}{l} 195.0 \\ 192.8 \\ 195.0 \end{array} \right\} 193.9$  | 22 28 50               |                                 |
| 19         | 20 <sup>h</sup> 0'  | $\left. \begin{array}{l} 199.5 \\ 200.7 \\ 199.5 \end{array} \right\} 200.1$  | 22 23 15               |                                 |
| 20         | 2 <sup>h</sup> 30'  | $\left. \begin{array}{l} 194.5 \\ 194.0 \\ 194.0 \end{array} \right\} 194.1$  | 22 28 39               |                                 |
| 20         | 20 <sup>h</sup> 0'  | $\left. \begin{array}{l} 201.2 \\ 201.0 \\ 201.2 \end{array} \right\} 201.1$  | 22 22 21               |                                 |
| 21         | 2 <sup>h</sup> 30'  | $\left. \begin{array}{l} 191.5 \\ 191.0 \\ 191.5 \end{array} \right\} 191.2$  | 22 31 16               |                                 |
| 21         | 20 <sup>h</sup> 0'  | $\left. \begin{array}{l} 200.7 \\ 202.0 \\ 200.8 \end{array} \right\} 201.5$  | 22 22 0                |                                 |
| 22         | 2 <sup>h</sup> 30'  | $\left. \begin{array}{l} 192.7 \\ 193.5 \\ 192.5 \end{array} \right\} 193.05$ | 22 29 39               |                                 |
| 22         | 20 <sup>h</sup> 0'  | $\left. \begin{array}{l} 200.2 \\ 194.5 \end{array} \right\} 200.2$           | 22 23 10               |                                 |
| 23         | 2 <sup>h</sup> 30'  | $\left. \begin{array}{l} 195.0 \\ 194.2 \end{array} \right\} 194.7$           | 22 28 7                |                                 |
| 23         | 20 <sup>h</sup> 0'  | $\left. \begin{array}{l} 201.2 \end{array} \right\} 201.2$                    | 22 22 16               |                                 |
| 24         | 2 <sup>h</sup> 30'  | $\left. \begin{array}{l} 192.7 \\ 193.5 \\ 192.5 \end{array} \right\} 193.05$ | 22 28 42               |                                 |

(d)

## Observaciones de declinacion magnética en Madrid durante el mes de setiembre de 1855.

| ÉPOCAS.    | Tiempo de Göttinga. | Lecturas en la escala del declinómetro.                                       | Declinacion magnética. | OBSERVACIONES.                                                       |
|------------|---------------------|-------------------------------------------------------------------------------|------------------------|----------------------------------------------------------------------|
| Setiem. 24 | 20 <sup>h</sup> 0'  | $\left. \begin{array}{l} 200.5 \\ 200.8 \\ 200.5 \end{array} \right\} 200.65$ | 22° 22' 46''           | Período notable por su declinacion constante y máxima hacia el N. O. |
| 25         | 2 <sup>h</sup> 30'  | $\left. \begin{array}{l} 193.5 \\ 193.7 \\ 193.5 \end{array} \right\} 193.6$  | 22 29 6                |                                                                      |
| 25         | 20 <sup>h</sup> 0'  | $\left. \begin{array}{l} 201.5 \\ 201.2 \\ 201.5 \end{array} \right\} 201.35$ | 22 22 8                |                                                                      |
| 26         | 2 <sup>h</sup> 30'  | $\left. \begin{array}{l} 193.7 \\ 194.2 \\ 193.5 \end{array} \right\} 193.9$  | 22 28 50               |                                                                      |
| 26         | 20 <sup>h</sup> 0'  | $\left. \begin{array}{l} 194.2 \\ 193.8 \\ 194.2 \end{array} \right\} 194.0$  | 22 28 45               |                                                                      |
| 27         | 2 <sup>h</sup> 30'  | 191.0                                                                         | 22 31 27               |                                                                      |
| 27         | 20 <sup>h</sup> 0'  | 194.5                                                                         | 22 28 18               |                                                                      |
| 28         | 2 <sup>h</sup> 30'  | $\left. \begin{array}{l} 191.0 \\ 192.0 \\ 191.0 \end{array} \right\} 191.5$  | 22 31 0                |                                                                      |
| 28         | 20 <sup>h</sup> 0'  | $\left. \begin{array}{l} 196.0 \\ 202.0 \\ 196.2 \end{array} \right\} 199.5$  | 22 23 48               |                                                                      |
| 29         | 2 <sup>h</sup> 30'  | $\left. \begin{array}{l} 194.5 \\ 194.0 \\ 194.5 \end{array} \right\} 194.25$ | 22 28 31               |                                                                      |
| 29         | 20 <sup>h</sup> 0'  | $\left. \begin{array}{l} 200.7 \\ 201.2 \\ 200.7 \end{array} \right\} 200.95$ | 22 22 29               |                                                                      |
| 30         | 2 <sup>h</sup> 30'  | $\left. \begin{array}{l} 194.2 \\ 193.8 \\ 194.2 \end{array} \right\} 194.0$  | 22 28 45               |                                                                      |
| 30         | 20 <sup>h</sup> 0'  | $\left. \begin{array}{l} 199.5 \\ 200.2 \\ 199.5 \end{array} \right\} 199.85$ | 22 23 29               |                                                                      |
| 30         | 22 <sup>h</sup> 0'  | 201.0                                                                         | 22 22 27               |                                                                      |

Figure S1. Declination values measured by Mr. Rico Sinobas at ROM in 1855, as published in Rico Sinobas (1856). (© Real Academia de Ciencias Exactas, Físicas y Naturales de España).



Observaciones de inclinación magnética en Madrid durante el mes de setiembre de 1855.

| EPOCAS.<br>—<br>Setiembre de 1855.        | Número<br>de la<br>brújula. | MARCA DE LA BRUJULA.       |        |       |        |                             |        |       |        | Inclinación<br>media. |
|-------------------------------------------|-----------------------------|----------------------------|--------|-------|--------|-----------------------------|--------|-------|--------|-----------------------|
|                                           |                             | ESTE.<br>CIRCULO GRADUADO. |        |       |        | OESTE.<br>CIRCULO GRADUADO. |        |       |        |                       |
|                                           |                             | Este.                      | Oeste. | Este. | Oeste. | Este.                       | Oeste. | Este. | Oeste. |                       |
| Setiembre 1.º á las 9<br>de la mañana.... | 1                           | 61º 15'                    | 10'    | 20'   | 10'    | 61º 22'                     | 25'    | 20'   | 15'    | 61º 18'               |
| Setiembre 5 á las 3<br>de la tarde.....   | 1                           | 61                         | 12     | 20    | 10     | 61                          | 5      | 30    | 35     | 61 16                 |
| Setiembre 8 á las 9<br>de la mañana....   | 1                           | 61                         | 25     | 22    | 15     | 61                          | 15     | 25    | 22     | 61 20                 |
| Setiembre 14 á las 9<br>de la mañana....  | 1                           | 61                         | 15     | 8     | 0      | 61                          | 0      | 25    | 20     | 61 11                 |
| Setiembre 17 á las 3<br>de la mañana....  | 1                           | 61                         | 18     | 25    | 15     | 61                          | 12     | 25    | 18     | 61 18                 |
| Setiembre 21 á las 3<br>de la tarde.....  | 1                           | 61                         | 5      | 18    | 5      | 61                          | 12     | 30    | 25     | 61 14                 |
| Setiembre 29 á las 9<br>de la mañana....  | 1                           | 61                         | 30     | 15    | 28     | 61                          | 10     | 28    | 20     | 61 22                 |

Figure S2. Inclination values measured by Mr. Rico Sinobas at ROM in 1855, as published in Rico Sinobas (1856). (© Real Academia de Ciencias Exactas, Físicas y Naturales de España).

S4 Compilation of declination measurements before 1855

Rico Sinobas (1856) also published a compilation of previous declination values determined in different locations of the Iberian Peninsula. The original data are reproduced in Fig. S3.

(a)

Observaciones anteriores de declinacion magnetica de que se tiene noticia.

| REGIONES.                                | EPOCAS.         | OBSERVADORES.      | DECLINACION MAGNETICA.          |
|------------------------------------------|-----------------|--------------------|---------------------------------|
| A 2½° O. de la isla del Cuervo (Azores). | 13 de set. 1492 | Cristobal Colon    | Isógona 0 (raya del almirante). |
| Al O. de las islas Azores.....           | 21 de mayo 1496 | El mismo almirante | Isógona 0 (raya)                |

12

El descubrimiento de la isógona sin declinacion por Colon, segun Humboldt, ha tenido entre otras la notable influencia de haber sido el primer origen de los estudios sobre el magnetismo terrestre, y sobre la marcha misteriosa de las agujas magnéticas, ya se muevan estas por causa de la posiccion del Sol respecto de un punto de la tierra, bien las variaciones en el noroeste y noroeste se presenten como consecuencia del cambio de lugar de una misma aguja en la superficie de la tierra.

Las declinaciones magnéticas, segun el almirante, aumentan nortados conforme que los meridianos por donde se navega se separan de la raya.

(b)

## Observaciones anteriores de declinación magnética de que se trata.

| REGIONES.                                                                           | EPOCAS.           | OBSERVADORES.                | DECLINACION<br>MAGNETICA. |
|-------------------------------------------------------------------------------------|-------------------|------------------------------|---------------------------|
| Paralelo de las Canarias y como á 100 leguas Oeste del Meridiano de las Azores..... | 16 de agosto 1498 | El mismo almirante           | Isógona 0 (raya)          |
| Cabo Finisterre (Galicia).....                                                      | 1589              | Wright                       | 7° 40' N. E.              |
| Lisboa.....                                                                         | 1638              | El P. Martinus<br>Conjetural | 7° 39' N. E.              |
| Costas Oeste de la Península.....                                                   | 1665              |                              | Isógona 0°                |
| Lisboa.....                                                                         | 1668              | El P. Martinus<br>Conjetural | 0° 50' N. O.              |
| Valencia.....                                                                       | 1669 á 1680       |                              | Isógona 0°                |
| Lisboa.....                                                                         | 1683              | El P. Martinus               | 30° 0' N. O.              |
| Lisboa.....                                                                         | 1697              | Couplet                      | 4° 18' N. O.              |
| Inmediaciones de las Baleares.....                                                  | 1700              | Marineros del Mediterraneo   | Isógona 0°                |
| Lisboa.....                                                                         | 1706              | Noel                         | 6° 30'                    |
| Valencia.....                                                                       | 1705 á 1710       | El P. Tosca                  | 5° 0'                     |
| Cádiz.....                                                                          | 1724              | Fouilló                      | 5° 25' N. O.              |
| Gibraltar.....                                                                      | 1733              | Buller                       | 13° 38' id.               |
| Cabo de Gata.....                                                                   | 1733              | Buller                       | 13° 56' id.               |
| Cabo de San Vicente.....                                                            | 1733              | Buller                       | 13 49 id.                 |
| Cabo de Santa Marta.....                                                            | 1734              | Buller                       | 14 20 id.                 |

Epoca mas próxima, durante la cual navegaban las agujas en la Península, segun las observaciones directas.

## Observaciones anteriores de declinacion magnética de que se tiene noticia.

| REGIONES.      | EPOCAS. | OBSERVADORES.    | DECLINACION<br>MAGNÉTICA. |
|----------------|---------|------------------|---------------------------|
| Madrid.....    | 1747    | D. Antonio Ulloa | 16° 30' N. O.             |
| Gibraltar..... | 1761    | Ross             | 17 41 id.                 |
| Lisboa.....    | 1762    | Ross             | 17 32 id.                 |
| Cadiz.....     | 1769    | Fleurieu         | 17 15 id.                 |
| Cadiz.....     | 1771    | Verdun           | 18 0 id.                  |
| Cadiz.....     | 1776    | D. Antonio Ulloa | 19 42 id.                 |
| Lisboa.....    | 1776    | Borda            | 19 0 id.                  |
| Lisboa.....    | 1782    | Lewenorn         | 19 51 id.                 |
| Madrid.....    | 1785    | »                | 20 0 id.                  |
| Cadiz.....     | 1791    | Lewenorn         | 21 56                     |
| Madrid.....    | 1799    | Humboldt         | 22 2                      |
| Madrid.....    | 1804    | Vallejo          | 21 30                     |
| Cadiz.....     | 1807    | Givry            | 22 30                     |
| Lisboa.....    | 1814    | Francini         | 22 45                     |

Deducida por el error de orientacion en el edificio del Observatorio de Madrid.

Máxima de las observaciones directas en la Península, pero debió llegar á ser mayor la declinacion en 1815, en cuyo año la máxima de Londres fué 27° 18'.

Figure S3. Declination values compiled and published in Rico Sinobas (1856). (© Real Academia de Ciencias Exactas, Físicas y Naturales de España).
